# Supplementary material
Source: PubMed Central journal article supplement (PMC6795083)
Supplement: 10.1194_M093955_jlr.M093955-1.pdf [file 10.1194_M093955_jlr.M093955-1.pdf]

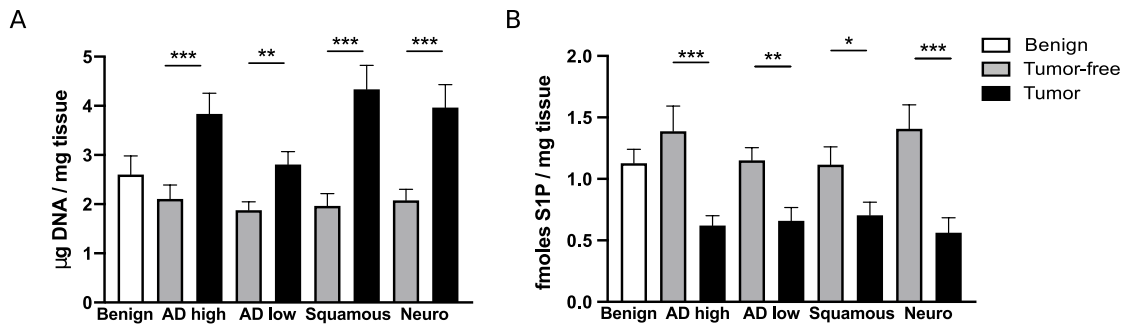

**Supplementary Figure 1: Lower levels of S1P in tumor tissue is maintained despite normalization by tissue weight.** DNA and sphingosine-1-phosphate (S1P) were quantified in homogenated lung parenchyma of ex-smoker patients with benign lung diseases (white); in tumor-free (grey) and tumor (black) lung tissues from patients with high-grade adenocarcinomas (AD high), low-grade adenocarcinomas (AD low), squamous and neuroendocrine (Neuro) lung carcinomas. A)  $\mu\text{g}$  of DNA per mg of homogenized tissue. B) S1P levels normalized to tissue mass. Bars represent the average  $\pm$  SEM, n=22-25. \* $p < 0.05$ , \*\* $p < 0.01$ , \*\*\* $p < 0.001$  compared to tumor-free tissue.

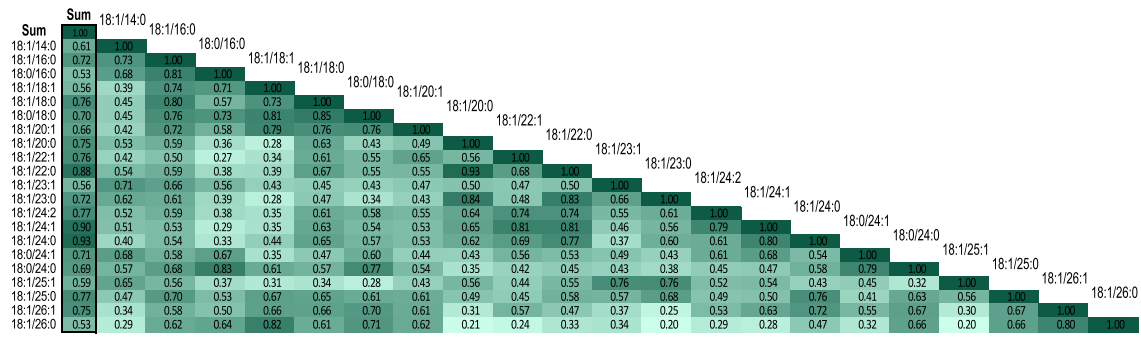

**Supplementary Figure 2: Individual ceramide chain length correlate with each other and with the total ceramide level.**

Shown are correlations R values between individual chain length of ceramides (Cer) measured and between the sum of ceramides and the individual chain lengths. Color intensity indicates correlation strength.

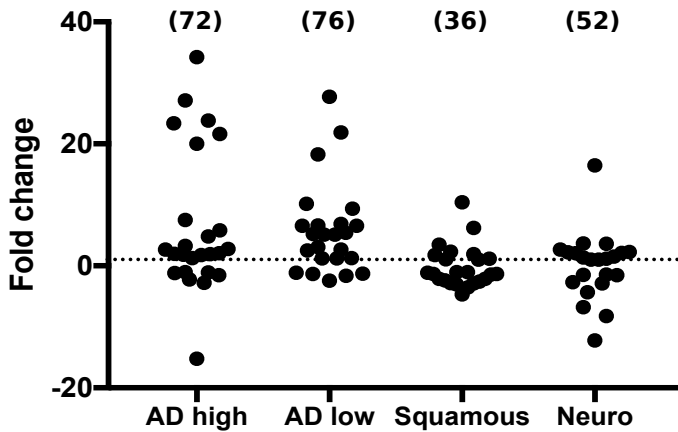

**Supplementary Figure 3: 2-hydroxyhexosylceramide levels are higher in tumor samples than in tumor-free tissue for the vast majority of adenocarcinoma patients.** The sum of 2-hydroxyhexosylceramides in tumor tissue was divided by the sum of 2-hydroxyhexosylceramides in the tumor-free tissue of each individual patient with low- and high-grade adenocarcinoma (AD), squamous and neuroendocrine (Neuro) carcinomas. The dotted line indicates equal levels of 2-hydroxyhexosylceramides in tumor and tumor-free tissue (ratio of 1) and the number in parentheses represents the percent of patients with fold change higher than 1.
